# Supplementary material for: Catalytic disproportionation of N-alkylhydroxylamines bound to pentacyanoferrates
Source: Royal Society of Chemistry journal article supplement (doi:10.1039/b812173g), 2008-12-22
Supplement: b812173g.pdf [file b812173g.pdf]

Supporting information

## Catalytic Disproportionation of *N*-Alkylhydroxylamines Bound to Pentacyanoferrates

María M. Gutiérrez,<sup>a</sup> Graciela B. Alluisetti,<sup>a</sup> José A. Olabe<sup>b</sup> and Valentín T. Amorebieta\*<sup>a</sup>

<sup>a</sup>Department of Chemistry, Facultad de Ciencias Exactas y Naturales, Universidad Nacional de Mar del Plata, Funes y Roca, Mar del Plata B7602AYL, Argentina. E-mail, [amorebie@mdp.edu.ar](mailto:amorebie@mdp.edu.ar)

<sup>b</sup>Department of Inorganic, Analytical and Physical Chemistry and INQUIMAE, CONICET, Facultad de Ciencias Exactas y Naturales, Universidad de Buenos Aires, Pabellón 2, Ciudad Universitaria, C1428EHA, Buenos Aires, Argentina.

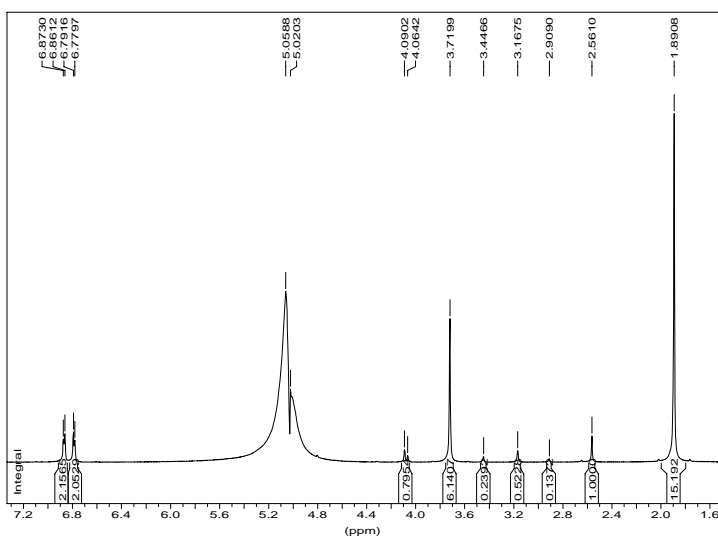

**Figure 1.** <sup>1</sup>H NMR spectrum of the solution of [Fe(CN)<sub>5</sub>H<sub>2</sub>O]<sup>3-</sup> 5 mM, MeHA 100 mM in D<sub>2</sub>O, at room temperature, pH 7.1 (2.5 M phosphates), internal standard NaCH<sub>3</sub>CO<sub>2</sub>.

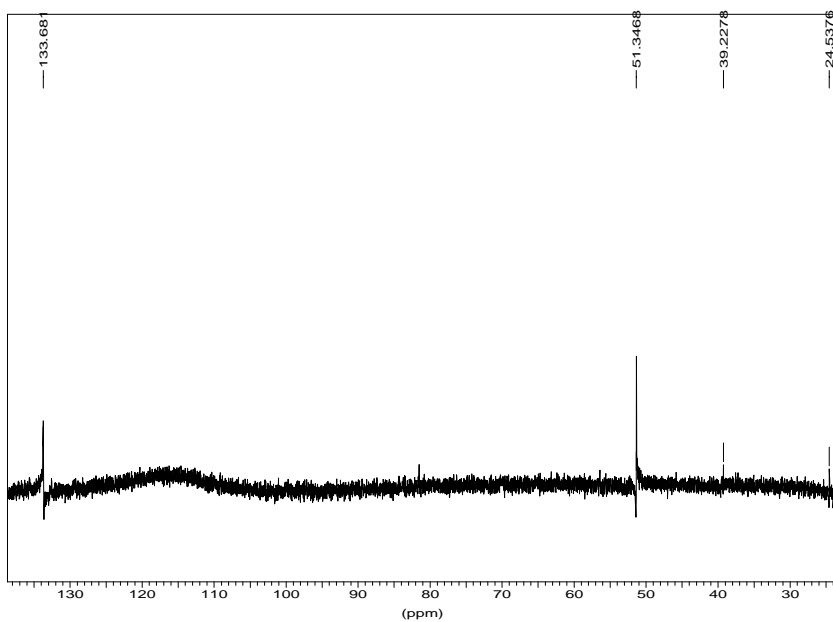

**Figure 2.** <sup>13</sup>C NMR spectrum of the solution of [Fe(CN)<sub>5</sub>H<sub>2</sub>O]<sup>3-</sup> 5 mM, MeHA 100 mM in D<sub>2</sub>O, at room temperature, pH 7.1 (2.5 M phosphates), internal standard NaCH<sub>3</sub>CO<sub>2</sub>.

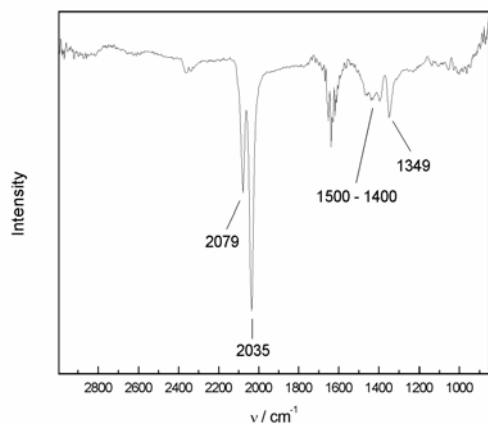

**Figure 3.** ATR spectrum of a reactive aqueous solution of  $[\text{Fe}(\text{CN})_5\text{H}_2\text{O}]^{3-}$  0.1 M with  $[\text{MeHA}]$  0.05 M, ( $\text{pH} \sim 4$ ), at room temperature. A background of MeHA-solution has been subtracted. Note the CN stretching of unreacted  $[\text{Fe}(\text{CN})_5\text{H}_2\text{O}]^{3-}$  at 2035  $\text{cm}^{-1}$ . The CN stretching at 2079, CH bending at 1500-1400 and NO stretching at 1349  $\text{cm}^{-1}$  correspond to the red complex.

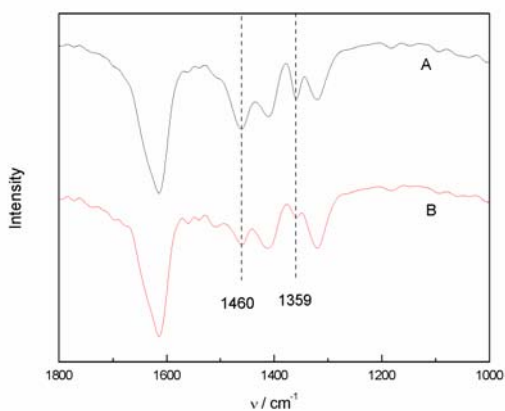

**Figure 4.** FTIR transmittance spectra of the red solid, KBr disk. CN stretching at 2090 (not showed), CH bending at 1460; NO stretching at 1359  $\text{cm}^{-1}$ .

| pH   | [Fe(CN) <sub>5</sub> H <sub>2</sub> O] <sup>3-</sup> , mM | [HN(CH <sub>3</sub> )OH], mM | <i>k</i> <sub>obs</sub> , s <sup>-1</sup> |
|------|-----------------------------------------------------------|------------------------------|-------------------------------------------|
| 5.9  | 0.18                                                      | 9.2                          | 0,12                                      |
| 6.05 | 0.14                                                      | 13.5                         | 0,24                                      |
| 6.05 | 0.12                                                      | 27.0                         | 0,50                                      |
| 6.1  | 0.053                                                     | 1.0                          | 0,014                                     |
| 6.1  | 0.116                                                     | 5.9                          | 0,089                                     |
| 7.12 | 0.07                                                      | 3                            | 0,11                                      |
| 7.12 | 0.27                                                      | 3.8                          | 0,13                                      |
| 7.12 | 0.137                                                     | 1.5                          | 0,036                                     |
| 7.12 | 0.12                                                      | 1.1                          | 0,036                                     |
| 7.12 | 0.16                                                      | 2.1                          | 0,056                                     |

**Table 1.** Pseudo-first order rate constants for the reaction of [Fe(CN)<sub>5</sub>H<sub>2</sub>O]<sup>3-</sup> with MeHA at different concentrations of reactants and pH's. T = 25.0 ± 0.2 °C, 20 mM phosphates and I = 1 M (NaCl).

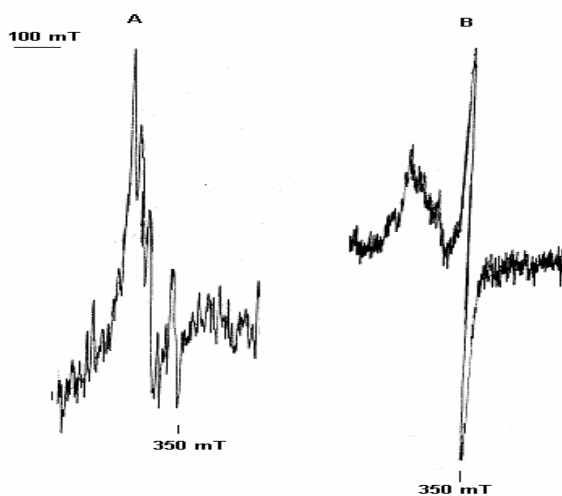

**Figure 5.** (A) Initial EPR spectrum of the red solid, obtained as a Zn-precipitate, for the reaction of [Fe(CN)<sub>5</sub>H<sub>2</sub>O]<sup>3-</sup> with MeHA, showing a triplet centered at 344 mT. (B) Final spectrum of the red solid, showing a singlet centered at 350 mT

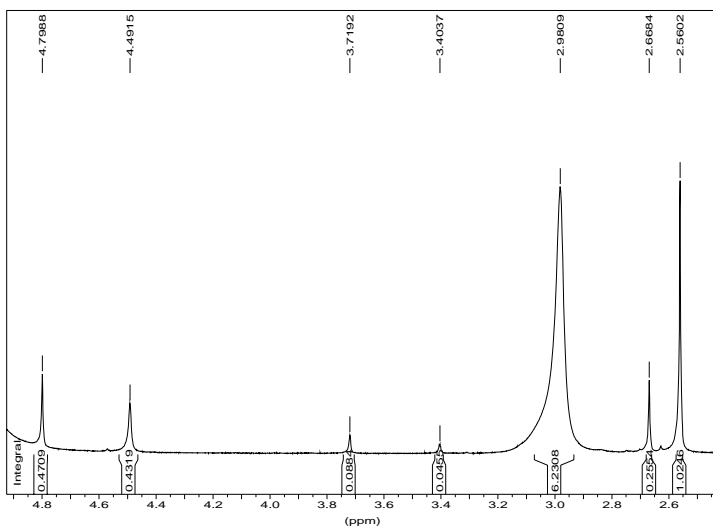

**Figure 6.** <sup>1</sup>H NMR spectrum of the solution of  $[\text{Fe}^{\text{II}}(\text{CN})_5\text{H}_2\text{O}]^{3-}$ : 5 mM,  $\text{Me}_2\text{HA}$  100 mM in  $\text{D}_2\text{O}$ , at room temperature, pH 7.1 (2.5 M phosphates), internal standard  $\text{NaCH}_3\text{CO}_2$ .

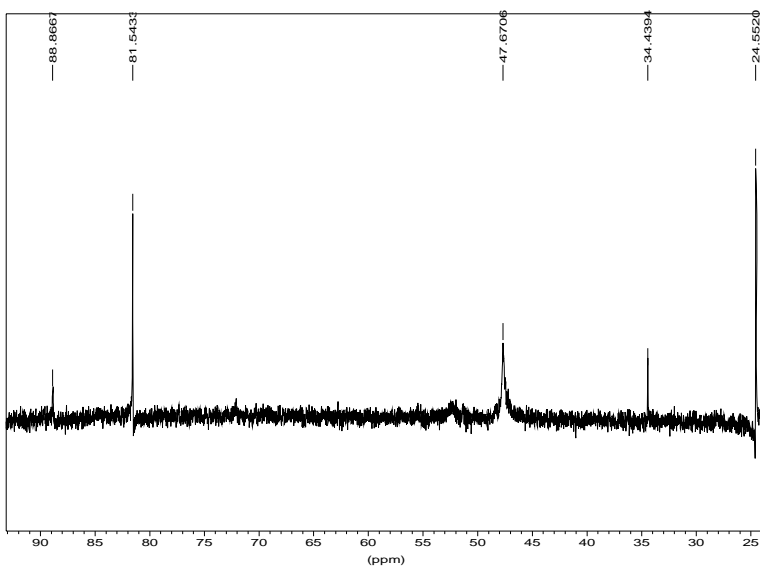

**Figure 7.** <sup>13</sup>C NMR spectrum of the solution of  $[\text{Fe}(\text{CN})_5\text{H}_2\text{O}]^{3-}$ : 5 mM,  $\text{Me}_2\text{HA}$  100 mM in  $\text{D}_2\text{O}$ , at room temperature, pH 7.1 (2.5 M phosphates), internal standard  $\text{NaCH}_3\text{CO}_2$ .

| pH   | [Fe(CN) <sub>5</sub> H <sub>2</sub> O] <sup>3-</sup> , mM | [(CH <sub>3</sub> ) <sub>2</sub> NOH], mM | <i>k</i> <sub>obs</sub> , s <sup>-1</sup> |
|------|-----------------------------------------------------------|-------------------------------------------|-------------------------------------------|
| 6.05 | 0.12                                                      | 1.54                                      | 0,00492                                   |
| 6.05 | 0.16                                                      | 10.8                                      | 0,0327                                    |
| 6.05 | 0.053                                                     | 38.0                                      | 0,125                                     |
| 6.05 | 0.12                                                      | 9.8                                       | 0,0356                                    |
| 6.05 | 0.19                                                      | 19.8                                      | 0,0693                                    |
| 6.05 | 0.07                                                      | 5.1                                       | 0,0178                                    |
| 6.1  | 0.18                                                      | 24.7                                      | 0,0752                                    |
| 6.1  | 0.16                                                      | 12.0                                      | 0.0389                                    |
| 7.05 | 0.054                                                     | 28.3                                      | 0.125                                     |
| 7.05 | 0.19                                                      | 12.5                                      | 0.057                                     |
| 7.1  | 0.11                                                      | 1.18                                      | 0.0046                                    |

**Table 2.** Pseudo-first order rate constants for the reaction of [Fe(CN)<sub>5</sub>H<sub>2</sub>O]<sup>3-</sup> with Me<sub>2</sub>HA at different concentrations of reactants and pH's, T = 25.0 ± 0.2 °C, 20 mM phosphates and I = 1 M (NaCl).

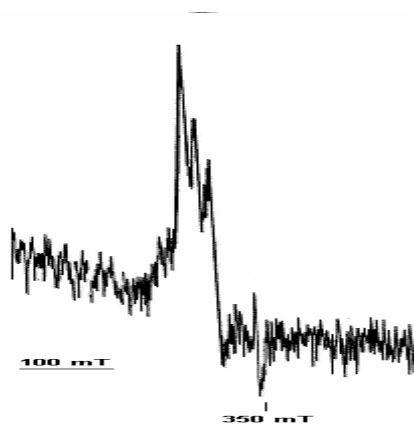

**Figure 8.** EPR spectrum of the solid obtained as a Zn-precipitate, for the reaction of [Fe(CN)<sub>5</sub>H<sub>2</sub>O]<sup>3-</sup> with Me<sub>2</sub>HA, showing a triplet centered at 343 mT.
